# Supplementary material for: A Cryptic Non-Inducible Prophage Confers Phage-Immunity on the Streptococcus thermophilus M17PTZA496
Source: PubMed Central journal article supplement (PMC6356513; doi:10.3390/v11010007), 2018-12-22

Supplementary Table S1 – Genbank accession number of the bacteriophages sequences (or genome sequences?) used to construct the phylogenomic tree. A total of 83 *S. thermophilus* phages and, 5 *Lactococcus lactis* phages were used to compose the tree.

| <b>Genbank accession number</b> | <b>Bacteriophage</b>                |
|---------------------------------|-------------------------------------|
| NC 002747                       | <i>Lactococcus</i> phage TP901-1    |
| NC 002703.1                     | <i>Lactococcus</i> phage Tuc2009    |
| DQ838728.1                      | <i>Lactococcus</i> phage P335       |
| DQ394806.1                      | <i>Lactococcus</i> phage ul36.k1    |
| NC 004066.1                     | <i>Lactococcus</i> phage ul36       |
| KX879642.1                      | <i>Streptococcus</i> phage CHPC926  |
| KX879641.1                      | <i>Streptococcus</i> phage CHPC577  |
| NC 013598.1                     | <i>Streptococcus</i> phage ALQ13.2  |
| NC 007019.1                     | <i>Streptococcus</i> phage 2972     |
| NC 010353.1                     | <i>Streptococcus</i> phage 858      |
| NC 022776.1                     | <i>Streptococcus</i> phage TP-778L  |
| NC 002214.1                     | <i>Streptococcus</i> phage Sfi11    |
| NC 020197.1                     | <i>Streptococcus</i> phage TP-J34   |
| NC 004303.1                     | <i>Streptococcus</i> phage O1205    |
| NC 000871.1                     | <i>Streptococcus</i> phage Sfi19    |
| NC 000872.1                     | <i>Streptococcus</i> phage Sfi21    |
| NC 002072.2                     | <i>Streptococcus</i> phage DT1      |
| NC 013645.1                     | <i>Streptococcus</i> phage Abc2     |
| NC 002185.1                     | <i>Streptococcus</i> phage 7201     |
| NC 012753.1                     | <i>Streptococcus</i> phage 5093     |
| KX879643.1                      | <i>Streptococcus</i> phage CHPC1151 |
| CM002372.1                      | <i>S. thermophilus</i> M17PTZA496   |
| NC_023503.1                     | <i>Streptococcus</i> phage 20617    |
| NC_031094.1                     | <i>Streptococcus</i> virus 9872     |
| NC_031069.1                     | <i>Streptococcus</i> virus 9871     |
| MH000602                        | <i>Streptococcus</i> phage D5842    |
| MH000603.1                      | <i>Streptococcus</i> phage D1024    |
| MF161328                        | <i>Streptococcus</i> phage D4276    |
| MH000604                        | <i>Streptococcus</i> phage D1811    |
| KY705258.1                      | <i>Streptococcus</i> phage P4761    |
| KY705268.1                      | <i>Streptococcus</i> phage P7571    |
| KY705269.1                      | <i>Streptococcus</i> phage P7572    |
| KY705277.1                      | <i>Streptococcus</i> phage P7951    |
| KY705278.1                      | <i>Streptococcus</i> phage P7952    |
| KY705279.1                      | <i>Streptococcus</i> phage P7953    |
| KY705280.1                      | <i>Streptococcus</i> phage P7954    |
| KY705281.1                      | <i>Streptococcus</i> phage P7955    |
| KY705285.1                      | <i>Streptococcus</i> phage P9852    |
| KY705286.1                      | <i>Streptococcus</i> phage P9853    |
| KT717085.1                      | <i>Streptococcus</i> phage 128      |
| MF580763.1                      | <i>Streptococcus</i> phage 16B8     |
| MF580764.1                      | <i>Streptococcus</i> phage 31B4     |
| KT717084.1                      | <i>Streptococcus</i> phage 53       |

|             |                                          |
|-------------|------------------------------------------|
| KT717083.1  | <i>Streptococcus</i> phage 73            |
| MF580759.1  | <i>Streptococcus</i> phage 7A5           |
| MF580760.1  | <i>Streptococcus</i> phage 7T            |
| MF580761.1  | <i>Streptococcus</i> phage 9A            |
| MF580762.1  | <i>Streptococcus</i> phage 9B4           |
| MF580765.1  | <i>Streptococcus</i> phage A0            |
| MF580766.1  | <i>Streptococcus</i> phage B0            |
| MF580767.1  | <i>Streptococcus</i> phage B5            |
| MF580768.1  | <i>Streptococcus</i> phage C0            |
| MH000603.1  | <i>Streptococcus</i> phage D1024         |
| MH000604.1  | <i>Streptococcus</i> phage D1811         |
| MF161328.1  | <i>Streptococcus</i> phage D4276         |
| MH000602.1  | <i>Streptococcus</i> phage D5842         |
| MF580769.1  | <i>Streptococcus</i> phage L5A1          |
| MF580770.1  | <i>Streptococcus</i> phage M19           |
| MF580771.1  | <i>Streptococcus</i> phage MM25          |
| KY705251.1  | <i>Streptococcus</i> phage P0091         |
| KY705256.1  | <i>Streptococcus</i> phage P3681         |
| KY705257.1  | <i>Streptococcus</i> phage P3684         |
| KY705259.1  | <i>Streptococcus</i> phage P5641         |
| KY705260.1  | <i>Streptococcus</i> phage P5651         |
| KY705261.1  | <i>Streptococcus</i> phage P5652         |
| KY705262.1  | <i>Streptococcus</i> phage P7132         |
| KY705263.1  | <i>Streptococcus</i> phage P7133         |
| KY705264.1  | <i>Streptococcus</i> phage P7134         |
| KY705265.1  | <i>Streptococcus</i> phage P7151         |
| KY705266.1  | <i>Streptococcus</i> phage P7152         |
| KY705267.1  | <i>Streptococcus</i> phage P7154         |
| KY705270.1  | <i>Streptococcus</i> phage P7573         |
| KY705271.1  | <i>Streptococcus</i> phage P7574         |
| KY705272.1  | <i>Streptococcus</i> phage P7601         |
| KY705273.1  | <i>Streptococcus</i> phage P7602         |
| KY705274.1  | <i>Streptococcus</i> phage P7631         |
| KY705275.1  | <i>Streptococcus</i> phage P7632         |
| KY705276.1  | <i>Streptococcus</i> phage P7633         |
| KY705282.1  | <i>Streptococcus</i> phage P8921         |
| KY705283.1  | <i>Streptococcus</i> phage P8922         |
| KY705284.1  | <i>Streptococcus</i> phage P9851         |
| KY705287.1  | <i>Streptococcus</i> phage P9854         |
| KY705288.1  | <i>Streptococcus</i> phage P9901         |
| KY705289.1  | <i>Streptococcus</i> phage P9902         |
| KY705290.1  | <i>Streptococcus</i> phage P9903         |
| MF580772.1  | <i>Streptococcus</i> phage R1            |
| MF580773.1  | <i>Streptococcus</i> phage STP1          |
| MF580774.1  | <i>Streptococcus</i> phage STP2          |
| MF580775.1  | <i>Streptococcus</i> phage V2            |
| MG708274.1  | <i>Streptococcus</i> phage vB_SthS_VA214 |
| MG708275.1  | <i>Streptococcus</i> phage vB_SthS_VA460 |
| MG708273.1  | <i>Streptococcus</i> phage vB_SthS_VA698 |
| NC_018285.1 | <i>Streptococcus</i> phage YMC-2011      |

---

Supplementary Table S2. TP2-M17PTZA496 annotation considering three different databases. Asterisks indicate lack of information according to each database

| Phaster             |                                  |          | Uniprot                                      |          |          | Pfam              |             |
|---------------------|----------------------------------|----------|----------------------------------------------|----------|----------|-------------------|-------------|
| Position            | Best hit                         | E-Value  | Best hit                                     | E-Value  | Identity | Best hit          | Accession n |
| 890763..<br>890775  | <i>attL</i>                      | N/A      | *                                            | *        | *        | *                 | *           |
| 891288..<br>891321  | <i>attL</i>                      | N/A      | *                                            | *        | *        | *                 | *           |
| 896847..<br>897140) | Integrase core domain<br>protein | 1.71e-18 | Transposase                                  | 2.9e-61  | 99.0%    | DDE_Tnp_IS2<br>40 | PF13610     |
| 897152..<br>897442  | Transposase                      | 3.89e-09 | Integrase core domain protein                | 1.1e-55  | 91.8%    | HTH_32            | PF13565     |
| 897805..<br>898287  | Sensory protein                  | N/A      | Carotenoid biosynthetic protein CrtK         | 1.3e-110 | 100.0%   | TspO_MBR          | PF03073     |
| 898485..<br>898862  | Hypothetical protein             | N/A      | NADH:ubiquinone oxidoreductase 27 kD subunit | 8.9e-78  | 95.9%    | Lipoprotein_22    | PF17294     |
| 899394..<br>899603  | Hypothetical protein             | N/A      | Eps4Q                                        | 2.3e-9   | 96.2%    | *                 | *           |
| 899501..<br>899731  | Putative transposase A           | 8.01e-09 | Transposase                                  | 2.4e-55  | 100.0%   | HTH_Tnp_1         | PF01527     |
| 900252..<br>900325  | tRNA                             | N/A      | *                                            | *        | *        | *                 | *           |

|          |                             |          |                                                          |          |        |                |         |
|----------|-----------------------------|----------|----------------------------------------------------------|----------|--------|----------------|---------|
| 900428.. | Hypothetical protein        | 1.03e-07 | Bacteriocin                                              | 7.2e-50  | 98.5%  | *              | *       |
| 900628   |                             |          |                                                          |          |        |                |         |
| 900759.. | Csp                         | 2.09e-17 | Cold-shock protein A                                     | 2.3e-50  | 100.0% | CSD            | PF00313 |
| 900959   |                             |          |                                                          |          |        |                |         |
| 901239.. | Csp                         | 8.42e-37 | Cold shock protein B                                     | 3.3e-49  | 100.0% | CSD            | PF00313 |
| 901439   |                             |          |                                                          |          |        |                |         |
| 902102.. | <i>attR</i>                 | N/A      | *                                                        | *        | *      | *              | *       |
| 902135   |                             |          |                                                          |          |        |                |         |
| 902208.. | Copper-translocating P-type | N/A      | Copper-translocating P-type ATPase                       | 0.0      | 96.7%  | E1-E2_ATPase   | PF00122 |
| 904349   | ATPase                      |          |                                                          |          |        |                |         |
| 904858.. | Restriction endonuclease    | N/A      | Type I restriction endonuclease                          | 1.2e-74  | 100.0% | *              | *       |
| 905184   |                             |          |                                                          |          |        |                |         |
| 905181.. | Putative restriction-       | 5.24e-08 | Type I restriction-modification system methyltransferase | 1.0e-123 | 99.4%  | N6_Mtase       | PF02384 |
| 905814   | modification protein        |          | subunit                                                  |          |        |                |         |
| 905731.. | ISL3 family transposase     | N/A      | Transposase                                              | 1.2e-40  | 81.0%  | *              | *       |
| 905982   |                             |          |                                                          |          |        |                |         |
| 906294.. | <i>attL</i>                 | N/A      | *                                                        | *        | *      | *              | *       |
| 906305   |                             |          |                                                          |          |        |                |         |
| 906321.. | Sugar transporter           | N/A      | Sugar transporter                                        | 0.0      | 100.0% | Sugar_transpor | PF06800 |
| 907208   |                             |          |                                                          |          |        | t              |         |

|                    |                                                     |          |                                                |          |        |                 |         |
|--------------------|-----------------------------------------------------|----------|------------------------------------------------|----------|--------|-----------------|---------|
| 907282..<br>907465 | Hypothetical protein                                | N/A      | DD-carboxypeptidase PBP3 Serine peptidase      | 9.3e-14  | 81.6%  | *               | *       |
| 908277..<br>909109 | Nuclease                                            | N/A      | Nuclease                                       | 0.0      | 100.0% | *               | *       |
| 909115..<br>909708 | Integrase                                           | 3.10e-21 | Integrase                                      | 9.5e-140 | 100.0% | Phage_integrase | PF00589 |
| 909785..<br>910816 | Hypothetical protein                                | N/A      | Uncharacterized protein                        | 0.0      | 98.0%  | *               | *       |
| 910773..<br>910967 | Hypothetical protein                                | N/A      | Uncharacterized protein                        | 8.6e-45  | 96.9%  | *               | *       |
| 911116..<br>911484 | Hypothetical protein                                | N/A      | Dipeptidase                                    | 1,00E-84 | 100.0% | Peptidase_C69   | PF03577 |
| 911540..<br>912349 | PrsW family intramembrane metalloprotease           | N/A      | Uncharacterized protein                        | 2.8e-15  | 50%    | *               | *       |
| 912507..<br>914051 | Zinc ABC transporter substrate-binding protein AdcA | N/A      | Zinc ABC transporter substrate-binding protein | 0.0      | 100.0% | ZinT            | PF09223 |
| 914135..<br>914146 | <i>attR</i>                                         | N/A      | *                                              | *        | *      | *               | *       |



Supplementary Table S3 – 61 ORFs were predicted among *attL* and *attR* attachment sites. In the total, 17 ORFs remained as coding sequences for hypothetical proteins. TP1-M17PTZA496 annotation was performed using three different approaches. Asterisks indicate lack of information according to each database.

| ORF | MyRast prediction                                     | Functional categorization       | Start | Stop  | Strand | PFAM prediction                                 | E-Value | PFAM accession | Uniprot prediction                                       | UNIPROT accession |
|-----|-------------------------------------------------------|---------------------------------|-------|-------|--------|-------------------------------------------------|---------|----------------|----------------------------------------------------------|-------------------|
| 1   | Phage integrase                                       | Lysogeny module                 | 1266  | 103   | -      | Phage integrase family                          | 6.8e-23 | PF00589.21     | *                                                        | *                 |
| 2   | Hypothetical protein                                  | Immunity                        | 1843  | 1415  | -      | Host cell surface-exposed lipoprotein           | 6.6e-15 | PF07553.10     | *                                                        | *                 |
| 3   | Phage protein                                         | Conjugation/transposon exchange | 2276  | 1890  | -      | ImmA                                            | 3.6e-09 | PF06114.12     | *                                                        | *                 |
| 4   | Putative $\text{cI}$ -like repressor-phage associated | Repressor/Lysogeny module       | 2604  | 2266  | -      | *                                               | *       | *              | *                                                        | *                 |
| 5   | Hypothetical protein                                  | Replication                     | 2803  | 3015  | +      | *                                               | *       | *              | DNA-binding protein ( <i>S. thermophilus</i> M17PTZA496) | A0A0E2Q201        |
| 6   | Hypothetical protein                                  | *                               | 3045  | 3989  | +      | *                                               | *       | *              | *                                                        | *                 |
| 7   | Phage Antirepressor protein                           | Repressor/Lysogeny module       | 3982  | 4527  | +      | ORF6C domain                                    | 5.4e-07 | PF10552.8      | **                                                       | **                |
| 8   | Phage excisionase                                     | Recombination                   | 4533  | 4772  | +      | *                                               | *       | *              | *                                                        | *                 |
| 9   | Phage protein                                         | *                               | 4916  | 5185  | +      | *                                               | *       | *              | *                                                        | *                 |
| 10  | Hypothetical protein                                  | *                               | 5204  | 5362  | +      | *                                               | *       | *              | *                                                        | *                 |
| 11  | Phage protein                                         | Immunity                        | 5543  | 6016  | +      | Siphovirus Gp157                                | 6.4e-37 | PF05565.10     | *                                                        | *                 |
| 12  | Phage DNA-binding protein                             | Replication                     | 6013  | 6714  | +      | AAA proteins                                    | 2.2e-30 | PF13479.5      | *                                                        | *                 |
| 13  | DNA helicase, phage-associated                        | Replication                     | 6689  | 8020  | +      | Type III restriction enzyme, res subunit        | 8.8e-11 | PF04851.14     | *                                                        | *                 |
| 14  | Single stranded DNA-binding protein, phage-associated | Replication                     | 8027  | 8482  | +      | Protein of unknown function (DUF669)            | 1.1e-22 | PF05037.12     | *                                                        | *                 |
| 15  | Phage replication protein                             | Replication                     | 8485  | 9291  | +      | Bifunctional DNA primase/polymerase, N-terminal | 1.5e-25 | PF09250.10     | *                                                        | *                 |
| 16  | DNA Primase/helicase, phage-associated                | Replication                     | 9278  | 10792 | +      | Poxvirus D5 protein-like                        | 2.6e-18 | PF03288.15     | *                                                        | *                 |
| 17  | Phage protein                                         | *                               | 11047 | 11478 | +      | *                                               | *       | *              | *                                                        | *                 |
| 18  | Conserved hypothetical protein - phage associated     | *                               | 11460 | 11780 | +      | VRR-NUC domain                                  | 4.8e-11 | PF08774.10     | *                                                        | *                 |
| 19  | Phage protein                                         | *                               | 11764 | 12006 | +      | *                                               | *       | *              | *                                                        | *                 |
| 20  | Hypothetical protein                                  | *                               | 11991 | 12170 | +      | *                                               | *       | *              | *                                                        | *                 |



|    |                                                  |                    |       |       |   |                                            |          |            |                                                |            |
|----|--------------------------------------------------|--------------------|-------|-------|---|--------------------------------------------|----------|------------|------------------------------------------------|------------|
| 21 | Hypothetical protein                             | *                  | 12167 | 12388 | + | *                                          | *        | *          | *                                              | *          |
| 22 | Phage protein                                    | *                  | 12378 | 12536 | + | *                                          | *        | *          | *                                              | *          |
| 23 | Adenine-specific methyltransferase (EC 2.1.1.72) | *                  | 12529 | 12813 | + | *                                          | *        | *          | *                                              | *          |
| 24 | Adenine-specific methyltransferase (EC 2.1.1.72) | *                  | 12843 | 13280 | + | DNA methyltransferase                      | 2.8e-19  | PF01555.17 | *                                              | *          |
| 25 | Hypothetical protein                             | *                  | 13336 | 13827 | + | Protein of unknown function (DUF1642)      | 9.2e-29  | PF07852.10 | *                                              | *          |
| 26 | Hypothetical protein                             | *                  | 14016 | 14297 | + | *                                          | *        | *          | *                                              | *          |
| 27 | Hypothetical protein                             | *                  | 14319 | 14900 | + | Protein of unknown function (DUF1642)      | 1.3e-16  | PF07852.10 | *                                              | *          |
| 28 | Phage DNA-binding protein                        | *                  | 14901 | 15413 | + | Helix-turn-helix                           | 1.0e-11  | PF01381.21 | *                                              | *          |
| 29 | Phage protein                                    | *                  | 15388 | 15690 | + | Protein of unknown function (DUF1372)      | 4.8e-39  | PF07116.10 | *                                              | *          |
| 30 | Hypothetical protein                             | *                  | 15687 | 16100 | + | YopX protein                               | 2.3e-22  | PF09643.9  | *                                              | *          |
| 31 | Phage protein                                    | *                  | 16102 | 16809 | + | Protein of unknown function (DUF1340)      | 2.7e-139 | PF07067.10 | *                                              | *          |
| 32 | Phage protein                                    | Host lysis         | 17197 | 17613 | + | *                                          | *        | *          | Autolysin ( <i>S. thermophilus</i> M17PTZA496) | A0A0E2Q2R7 |
| 33 | Phage terminase, small subunit                   | Packaging          | 17795 | 18247 | + | Terminase small subunit                    | 3.2e-18  | PF03592.15 | *                                              | *          |
| 34 | Phage terminase, large subunit                   | Packaging          | 18273 | 18905 | + | *                                          | *        | *          | *                                              | *          |
| 35 | Phage terminase, large subunit                   | Packaging          | 19193 | 19780 | + | Terminase RNaseH-like domain               | 8.5e-08  | PF17289.1  | *                                              | *          |
| 36 | Phage portal protein                             | Head morphogenesis | 19789 | 21294 | + | Phage portal protein, SPP1 Gp6-like        | 1.3e-104 | PF05133.13 | *                                              | *          |
| 37 | Phi Mu50B-like protein                           | Head morphogenesis | 21291 | 22184 | + | Phage Mu protein F like protein            | 6.6e-24  | PF04233.13 | *                                              | *          |
| 38 | Phage capsid and scaffold                        | Head morphogenesis | 22375 | 22956 | + | Domain of unknown function (DUF4355)       | 1.1e-16  | PF14265.5  | *                                              | *          |
| 39 | Phage major capsid protein                       | Head morphogenesis | 22976 | 23335 | + | *                                          | *        | *          | *                                              | *          |
| 40 | Phage major capsid protein                       | Head morphogenesis | 23354 | 24400 | + | Phage major capsid protein E               | 6.7e-40  | PF03864.14 | *                                              | *          |
| 41 | Phage protein                                    | *                  | 24402 | 24563 | + | *                                          | *        | *          | *                                              | *          |
| 42 | Phage protein                                    | Structural protein | 24575 | 24916 | + | Phage gp6-like head-tail connector protein | 7.9e-06  | PF05135.12 | *                                              | *          |
| 43 | Phage protein                                    | *                  | 24913 | 25227 | + | *                                          | *        | *          | *                                              | *          |
| 44 | Phage protein                                    | *                  | 25229 | 25573 | + | *                                          | *        | *          | Histone H1( <i>S. thermophilus</i> M17PTZA496) | A0A0E2Q247 |
| 45 | Phage capsid and scaffold                        | *                  | 25570 | 25956 | + | Protein of unknown function (DUF3168)      | 4.5e-05  | PF11367.7  | *                                              | *          |
| 46 | Phage tail protein                               | Tail morphogenesis | 25969 | 26478 | + | Phage tail tube protein                    | 5.5e-27  | PF06199.10 | *                                              | *          |
| 47 | Phage protein                                    | Tail morphogenesis | 26551 | 26904 | + | Phage tail assembly chaperone protein, TAC | 5.9e-30  | PF12363.7  | *                                              | *          |
| 48 | Phage protein                                    | *                  | 26994 | 27272 | + | *                                          | *        | *          | *                                              | *          |
| 49 | Phage tail length tape-measure protein           | Tail morphogenesis | 27262 | 31899 | + | *                                          | *        | *          | *                                              | *          |
| 50 | Phage tail protein                               | Tail morphogenesis | 31899 | 33434 | + | Phage tail protein                         | 8.1e-38  | PF05709.10 | *                                              | *          |

|    |                                                               |                    |       |       |   |                                                 |          |            |                                                          |            |
|----|---------------------------------------------------------------|--------------------|-------|-------|---|-------------------------------------------------|----------|------------|----------------------------------------------------------|------------|
| 51 | Phage tail protein                                            | Tail morphogenesis | 33437 | 36913 | + | Prophage endopeptidase tail                     | 2.3e-13  | PF06605.10 | *                                                        | *          |
| 52 | Phage capsid and scaffold                                     | Structural protein | 36914 | 38962 | + | Siphovirus protein of unknown function (DUF859) | 9.5e-299 | PF05895.11 | *                                                        | *          |
| 53 | Phage protein                                                 | *                  | 38989 | 39399 | + | Protein of unknown function (DUF1366)           | 8.8e-51  | PF07104.10 | *                                                        | *          |
| 54 | Phage protein                                                 | *                  | 39419 | 39565 | + | *                                               | *        | *          | *                                                        | *          |
| 55 | Hypothetical protein                                          | *                  | 39578 | 39901 | + | *                                               | *        | *          | *                                                        | *          |
| 56 | Phage holin                                                   | Host lysis         | 39909 | 40151 | + | Bacteriophage holin                             | 6.8e-17  | PF04531.12 | *                                                        | *          |
| 57 | Phage lysin, N-acetylmuramoyl-L-alanine amidase (EC 3.5.1.28) | Host lysis         | 40153 | 40998 | + | N-acetylmuramoyl-L-alanine amidase              | 5.3e-15  | PF05382.12 | *                                                        | *          |
| 58 | Hypothetical protein                                          | *                  | 41657 | 42001 | + | *                                               | *        | *          | *                                                        | *          |
| 59 | Phage protein                                                 | *                  | 42023 | 42574 | + | *                                               | *        | *          | Elongation factor G ( <i>S. thermophilus</i> M17PTZA496) | A0A0E2Q264 |
| 60 | Hypothetical protein                                          | *                  | 42662 | 42979 | + | *                                               | *        | *          | *                                                        | *          |
| 61 | Phage protein                                                 | *                  | 43013 | 43435 | + | *                                               | *        | *          | *                                                        | *          |

Supplementary Table S4 – 27 different spacers were predicted for the prophage M17PTZA496 in 3 diverse species of the genus *Streptococcus* (24 *S. thermophilus*, 2 *S. salivarius* and 1 *S. macedonicus*) using the CRISPRdb database. Only spacers with E-Value less than 0.001 are shown.

| Sequence ID                                                                                                                                                              | Spacer sequence                                                                         | Identity | E-Value  |
|--------------------------------------------------------------------------------------------------------------------------------------------------------------------------|-----------------------------------------------------------------------------------------|----------|----------|
| <i>S. thermophilus</i> JIM 8232                                                                                                                                          | gttctatccattcagcgataacttagaagaattaaaa<br>     <br>gttctatccattcagcgataacttagaagaattaaaa | 1.0      | 2.00E-10 |
| <i>S. thermophilus</i> JIM 8232                                                                                                                                          | ttaactggatttgggtcaacaagaaaacagaaacagt<br>     <br>ttaactggatttgggtcaacaagcaaacagaaacagt | 0.9      | 3.00E-08 |
| <i>S. thermophilus</i> ASCC 1275<br><i>S. thermophilus</i> MN-BM-A02<br><i>S. thermophilus</i> MN-BM-A0<br><i>S. thermophilus</i> KLDS SM<br><i>S. thermophilus</i> ND07 | cgcaaccctccttagacatgggaacagtacta<br>     <br>cgcaaccctccttagacatgggaacagtacta           | 1.0      | 3.00E-08 |
| <i>S. thermophilus</i> ASCC 1275<br><i>S. thermophilus</i> MN-BM-A02<br><i>S. thermophilus</i> KLDS SM<br><i>S. thermophilus</i> ND07                                    | atattgttaatgataactacaaatttaaacgag<br>     <br>atattgttaatgataactacaaatttaaacgag         | 1.0      | 3.00E-08 |
| <i>S. thermophilus</i> ND03                                                                                                                                              | cggacagcgataaatacactctatacagaga<br>     <br>cggacagcgataaatacactctatacagaga             | 1.0      | 3.00E-07 |
| <i>S. thermophilus</i> CNRZ1066<br><i>S. thermophilus</i> CS8                                                                                                            | taatcgtaaagagggttttggaaatacgttct<br>     <br>taatcgtaaagagggttttggaaatacgttct           | 1.0      | 1.00E-06 |
| <i>S. thermophilus</i> LMD-9<br><i>S. thermophilus</i> ASCC 1275<br><i>S. thermophilus</i> MN-BM-A02<br><i>S. thermophilus</i> SMQ-301<br><i>S. thermophilus</i> KLDS SM | catcataggcggaactggtaggatgtacac<br>     <br>catcataggcggaactggtaggatgtacac               | 1.0      | 1.00E-06 |
| <i>S. thermophilus</i> JIM 8232                                                                                                                                          | aagaagcagcaagatgcatcaaacaccgca<br>     <br>aagaagcagcaagatgcatcaaacaccgca               | 1.0      | 1.00E-06 |
| <i>S. thermophilus</i> JIM 8232<br><i>S. thermophilus</i> ASCC 1275<br><i>S. thermophilus</i> MN-BM-A02<br><i>S. thermophilus</i> KLDS SM<br><i>S. thermophilus</i> ND07 | ttcttcggttcttcaaacgttaaattccaa<br>     <br>ttcttcggttcttcaaacgttaaattccaa               | 1.0      | 1.00E-06 |
| <i>S. thermophilus</i> MN-ZLW-002<br><i>S. thermophilus</i> MN-BM-A01                                                                                                    | caaccagacatgaatgtcattagatatgt<br>     <br>caaccagacatgaatgtcattagatatgt                 | 1.0      | 1.00E-06 |
| <i>S. thermophilus</i> ASCC 1275<br><i>S. thermophilus</i> MN-BM-A02<br><i>S. thermophilus</i> KLDS SM<br><i>S. thermophilus</i> ND07                                    | gagcgagctcgaaataatcttaattacaag<br>     <br>gagcgagctcgaaataatcttaattacaag               | 1.0      | 1.00E-06 |
| <i>S. thermophilus</i> ASCC 1275<br><i>S. thermophilus</i> MN-BM-A02<br><i>S. thermophilus</i> KLDS SM<br><i>S. thermophilus</i> ND07                                    | cgagtaagtattaatcaggattgggacgcc<br>     <br>cgagtaagtattaatcaggattgggacgcc               | 1.0      | 1.00E-06 |

|                                                                                                                                                                            |                                                                                       |     |          |
|----------------------------------------------------------------------------------------------------------------------------------------------------------------------------|---------------------------------------------------------------------------------------|-----|----------|
| <i>S. thermophilus</i> ASCC 1275<br><i>S. thermophilus</i> MN-BM-A02<br><i>S. thermophilus</i> KLDS SM<br><i>S. thermophilus</i> ND07                                      | aatgacgaggagctattggcacaacttaca<br>     <br>aatgacgaggagctattggcacaacttaca             | 1.0 | 1.00E-06 |
| <i>S. thermophilus</i> ND07                                                                                                                                                | catcatagggcggaactggtaggatgtacac<br>     <br>catcatagggcggaactggtaggatgtacac           | 1.0 | 1.00E-06 |
| <i>S. salivarius</i> CCHSS3                                                                                                                                                | tgaatctgtccagtccttcagtgcttagcaagg<br>     <br>tgaatctgtccagtccttcattgtcttagcaagg      | 0.9 | 1.00E-05 |
| <i>S. thermophilus</i> JIM 8232                                                                                                                                            | taaagaacataaacatataatgaatactttagaact<br>     <br>taaagaacataaacatataatgaatactttagaact | 0.9 | 1.00E-05 |
| <i>S. thermophilus</i> JIM 8232                                                                                                                                            | aaacattgatgagtattattgataaaacttca<br>     <br>aaacattgatgagtattattgaaaaacttca          | 0.9 | 5.00E-05 |
| <i>S. thermophilus</i> KLDS 3.1003                                                                                                                                         | tgaagcactatggaacgatacattagtagt<br>     <br>tgaagcactatggaatgatacattagtagt             | 0.9 | 5.00E-05 |
| <i>S. thermophilus</i> LMD-9<br><i>S. thermophilus</i> SMQ-301                                                                                                             | aacagttactattaatcatgattccaacgg<br>     <br>aacagttactattaatcacgattccaacgg             | 0.9 | 2.00E-04 |
| <i>S. thermophilus</i> JIM 8232                                                                                                                                            | tatatataagtttccgaaagtaaaccgaacc<br>     <br>tatatataagtttccgaaagtagacgaacc            | 0.9 | 2.00E-04 |
| <i>S. thermophilus</i> JIM 8232                                                                                                                                            | ggacgcatattgaacaacataaccattta<br>     <br>ggacgcatattgaacagcataaccattta               | 0.9 | 2.00E-04 |
| <i>S. salivarius</i> 57.1                                                                                                                                                  | ttcgaaatatttatattttccatttggtaa<br>     <br>ttcgaaatatttatattttccgtttggtaa             | 0.9 | 2.00E-04 |
| <i>S. thermophilus</i> MN-ZLW-002<br><i>S. thermophilus</i> ASCC 1275<br><i>S. thermophilus</i> MN-BM-A02<br><i>S. thermophilus</i> KLDS SM<br><i>S. thermophilus</i> ND07 | cgatggaaatgatggattgccaggtaagga<br>     <br>cgatggaaatgatggcttgccaggtaagga             | 0.9 | 2.00E-04 |
| <i>S. macedonicus</i> ACA-DC 198                                                                                                                                           | ggctttccgtcaaacattacgactttttc<br>     <br>ggcttaccgtcaaacattacgactttttc               | 0.9 | 6.00E-04 |
| <i>S. thermophilus</i> JIM 8232                                                                                                                                            | aaaag-tgttgacaaactatcatatatg<br>     <br>aaaagggtgttgacaaactatcatatatg                | 0.9 | 6.00E-04 |
| <i>S. thermophilus</i> ASCC 1275<br><i>S. thermophilus</i> MN-BM-A02<br><i>S. thermophilus</i> KLDS SM<br><i>S. thermophilus</i> ND07                                      | aatcaatacgacaagag-taaacatggtctt<br>     <br>aatcaatacgacaagagttaaa-atggtctt           | 0.9 | 6.00E-04 |
| <i>S. thermophilus</i> KLDS 3.1003                                                                                                                                         | aatgtcatggggttctgatatgtctagct<br>     <br>aatgtcatggggtgctgatatgtctagct               | 0.9 | 6.00E-04 |

Supplementary Figure S1. RT-qPCR experimental design. Cntr1 – PBS buffer; Pt1 – phageVA460; Cntr2 – MmC (1  $\mu\text{g}/\text{mL}$ ); Pt2 – VA460 plus MmC (1  $\mu\text{g}/\text{mL}$ ). T0, T1 and T2 are, respectively, sampling times after 0, 30 and 60 min.

### *S. thermophilus* M17PTZA496

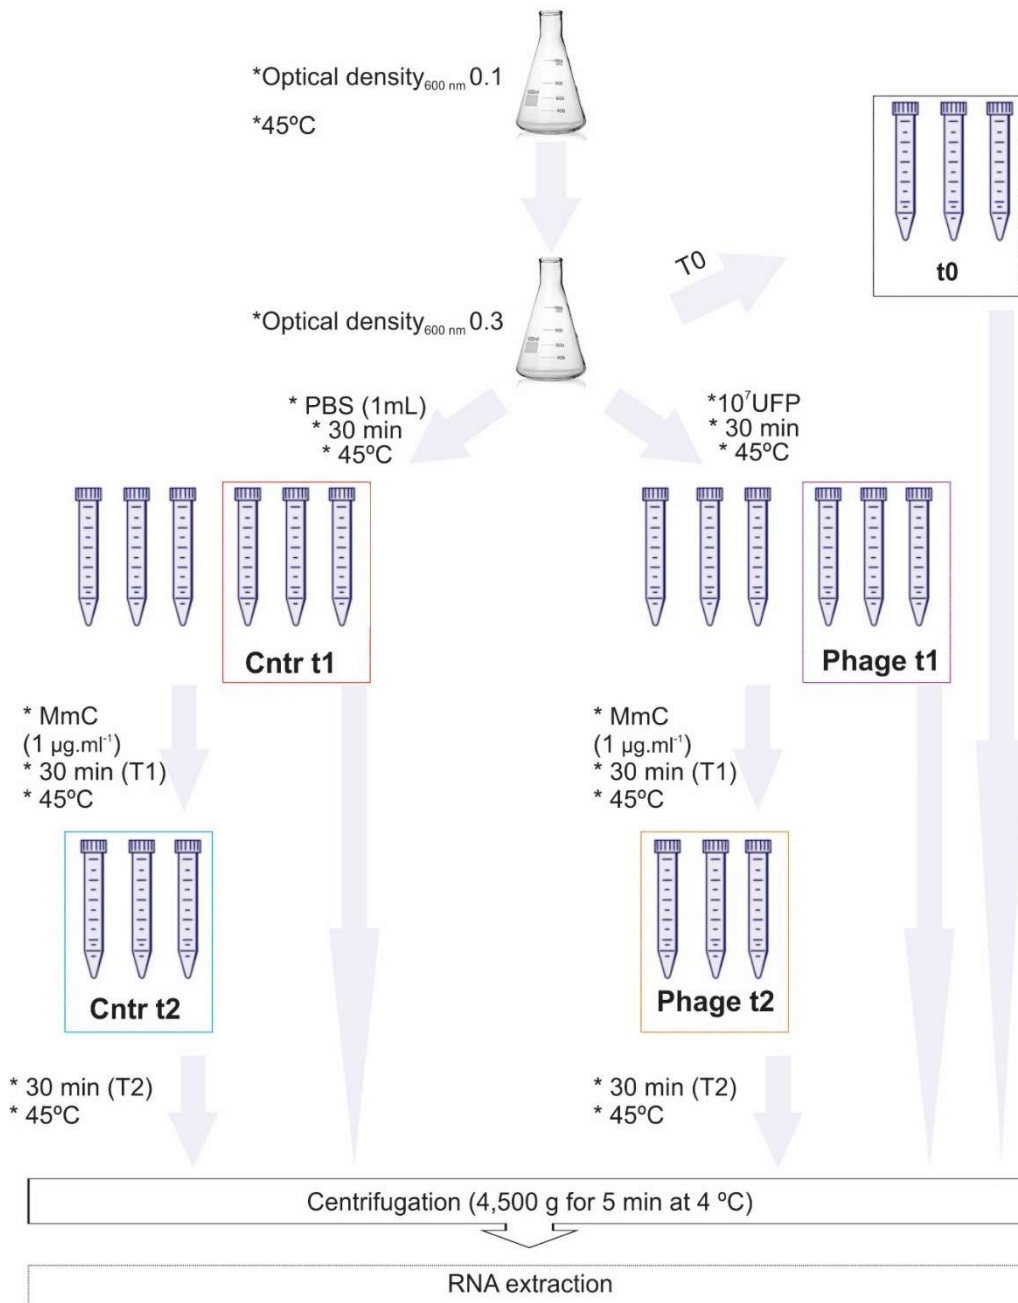

Supplementary Figure S2 –RNA integrity was evaluated on denaturing formaldehyde agarose gel (0.5% w/v). We used as positive control (C+) RNA extracted from *Saccharomyces cerevisiae*. Samples were taken after three different times: 0 (T0), 30 (Pt1) and 60 min (Pt2). Cntr1 and Cntr2 correspond, respectively, sampling after PBS buffer and Mitomycin C addition.

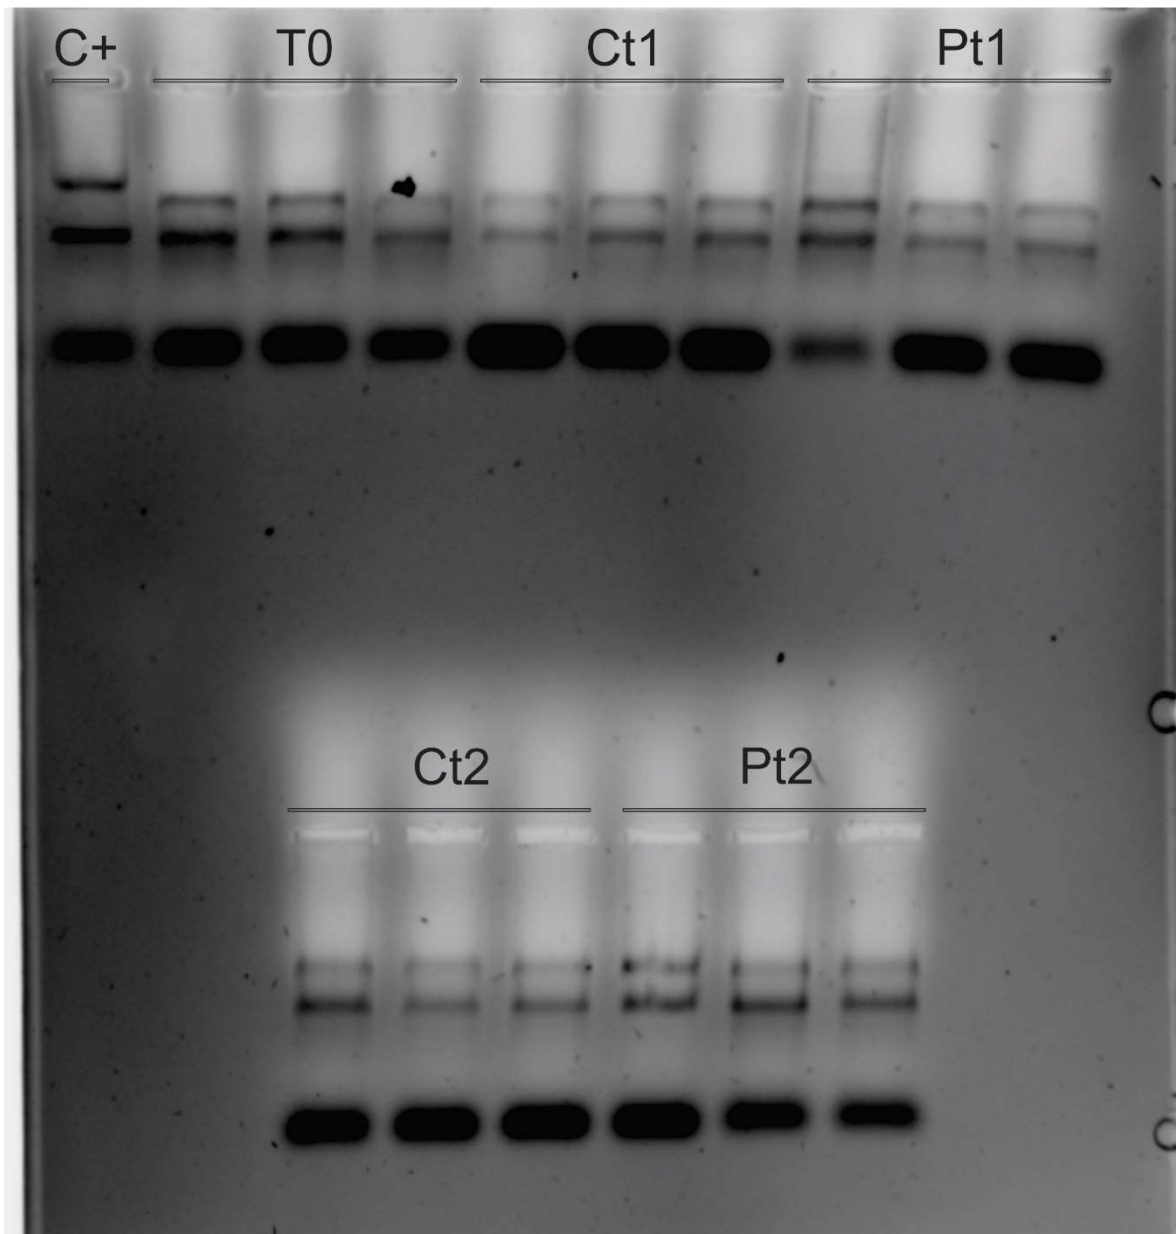

Supplement: viruses-11-00007-s001.pdf [file viruses-11-00007-s001.pdf]
